# Supplementary material
Source: Springer Nature journal article supplement (https://www.springermedizin.de/resource/supplementary/12889_2009_1846_MOESM2_ESM.pdf/9504172)

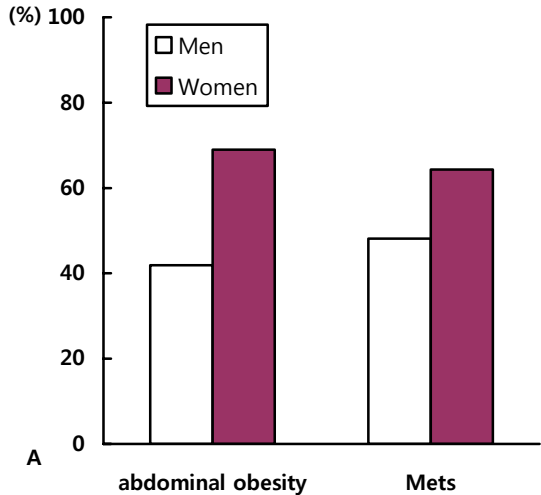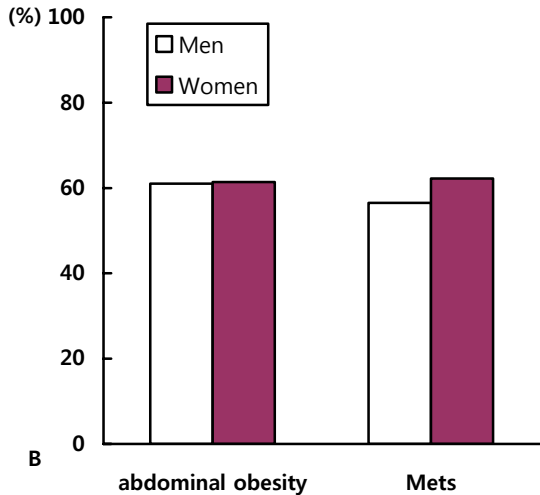

Supplement: MOESM2 [file 9504172]
